# Supplementary material for: A massive input of coarse-grained siliciclastics in the Pyrenean Basin during the PETM: the missing ingredient in a coeval abrupt change in hydrological regime
Source: Copernicus journal article supplement (doi:10.5194/cp-11-1653-2015), 2015-12-11
Supplement: Supplementary file 1 [file cp-11-1653-2015-supplement.pdf]

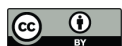

## *Supplement of*

# **A massive input of coarse-grained siliciclastics in the Pyrenean Basin during the PETM: the missing ingredient in a coeval abrupt change in hydrological regime**

**V. Pujalte et al.**

*Correspondence to:* V. Pujalte ([victoriano.pujalte@ehu.eus](mailto:victoriano.pujalte@ehu.eus))

The copyright of individual parts of the supplement might differ from the CC-BY 3.0 licence.

**V. Pujalte, J. I. Baceta, and B. Schmitz**

A massive input of coarse-grained siliciclastics in the Pyrenean Basin during the PETM:  
the missing ingredient in a coeval abrupt change in hydrological regimen.

**SUPPLEMENTARY FIGURES S1 and S2**

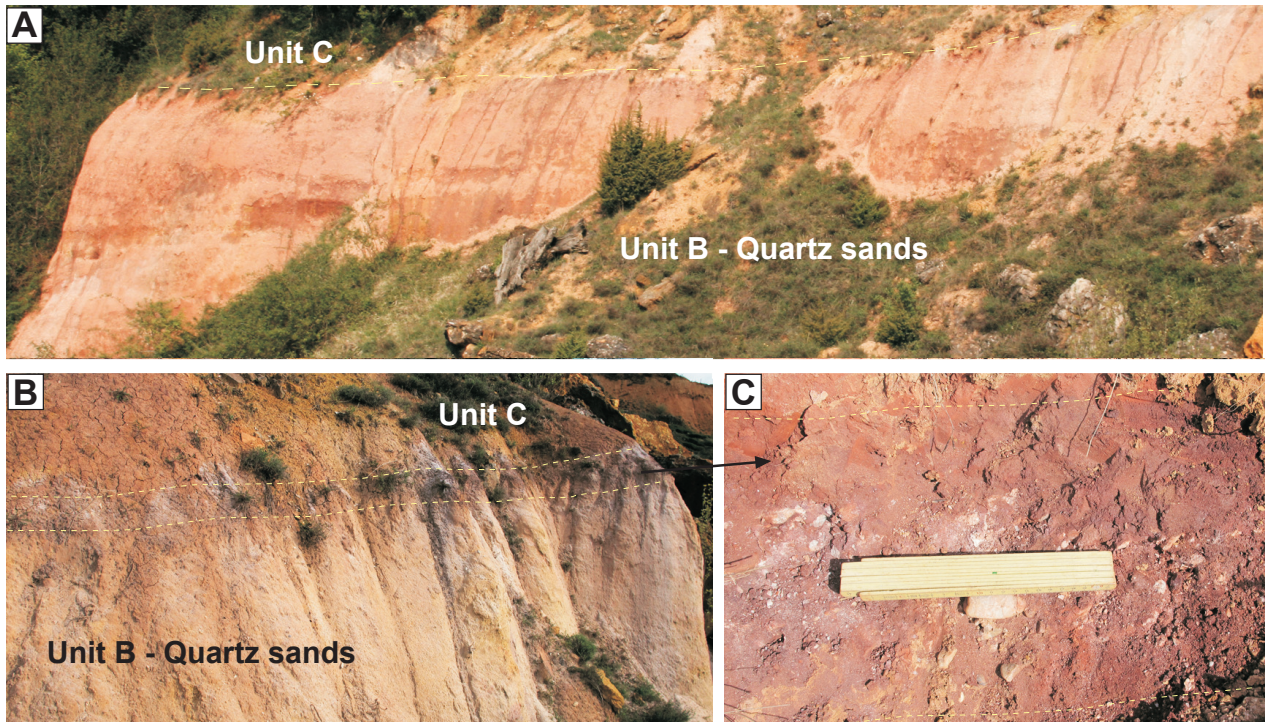

**Fig. S1. Arenaza quarry (abandoned):** (a) General view showing the reddish color of unit B in weathered exposures. (b and c) General and close-up views of the hematite concentration at the top of unit B.

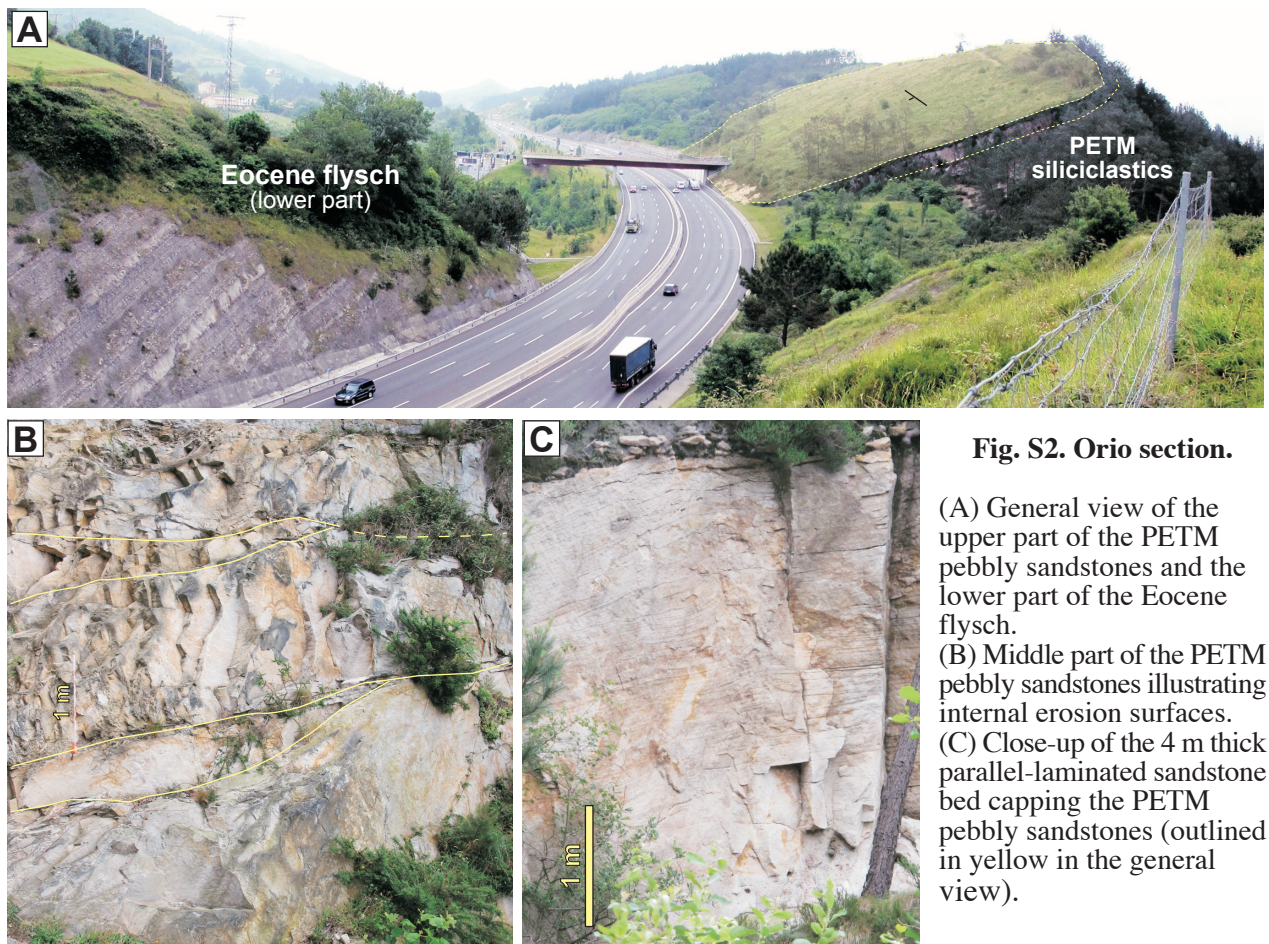

**Fig. S2. Orío section.**

(A) General view of the upper part of the PETM pebbly sandstones and the lower part of the Eocene flysch.  
(B) Middle part of the PETM pebbly sandstones illustrating internal erosion surfaces.  
(C) Close-up of the 4 m thick parallel-laminated sandstone bed capping the PETM pebbly sandstones (outlined in yellow in the general view).
